# Supplementary material for: Protein kinase CK2 activates Nrf2 via autophagic degradation of Keap1 and activation of AMPK in human cancer cells
Source: PubMed Central journal article supplement — BMB Rep. 2020 May 31;53(5):272–7. doi: 10.5483/BMBRep.2020.53.5.044 (PMC7262510; doi:10.5483/bmbrep.2020.53.5.044), 2020-05-31
Supplement: BMB-53-272_Supple.pdf [file BMB-53-272_Supple.pdf]

**Manuscript Type:** Article

**Title:** Protein kinase CK2 activates Nrf2 via autophagic degradation of Keap1 and activation of AMPK in human cancer cells

**Author's name:** Da eun Jang<sup>1,a</sup>, Junbin Song<sup>1,a</sup>, Jeong-Woo Park<sup>1</sup>, Soo-Hyun Yoon<sup>2</sup>, and Young-Seuk Bae<sup>1,\*</sup>

**Affiliation:** <sup>1</sup> *School of Life Sciences, BK21 Plus KNU Creative BioResearch Group, Kyungpook National University, Daegu 41566, Republic of Korea*

<sup>2</sup> *Research Institute of Pharmaceutical Sciences, College of Pharmacy, Kyungpook National University, Daegu 41566, Republic of Korea*

<sup>a</sup>These authors contributed equally to this work.

**Running Title:** Regulation of Nrf2 by CK2

**Keywords:** CK2, Nrf2, AMPK, Keap1, antioxidants

**\*Corresponding author.** Young-Seuk Bae, Tel: 82-53-950-6355; Fax: 82-53-943-2762; E-mail: [ysbae@knu.ac.kr](mailto:ysbae@knu.ac.kr)

sFig. 1.

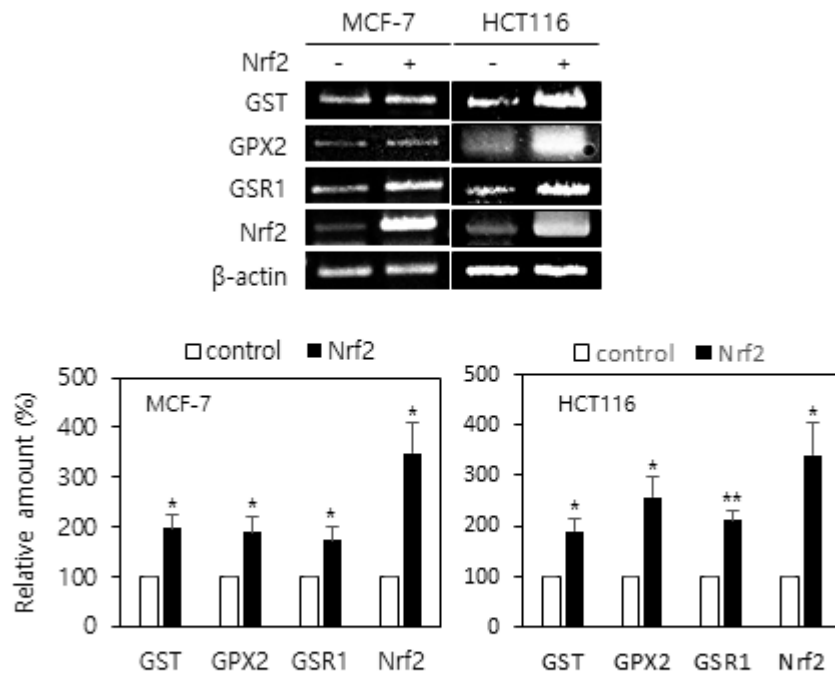

sFig. 2

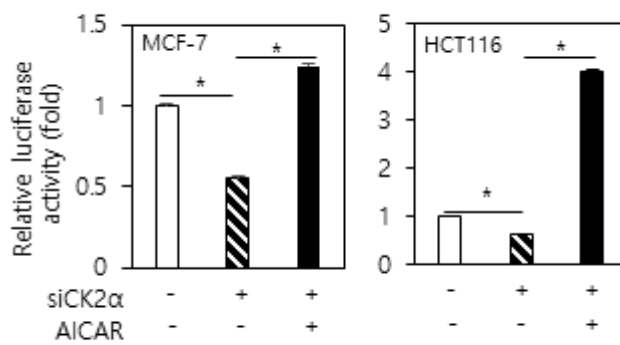

## Supplementary Figure legends

### **sFig. 1. Nrf2 overexpression upregulates GST, GPX2, and GSR1 in human cancer cells.**

Cells were transfected with the Nrf2 cDNA for 48 h. Total RNA was extracted from the cells, and RT-PCR was performed using specific primers. PCR products were resolved on a 2% agarose gel (upper panel). Graphs show the quantification of the mRNA level of each gene relative to that of *β-actin* (bottom panel). Data are shown as means ± SEM. \**P* <0.05; \*\**P* <0.01.

### **sFig. 2. CK2 regulates the Nrf2 activity via AMPK in human cancer cells.**

MCF-7 and HCT116 cells were co-transfected with the ARE luciferase construct and CK2α siRNA into in the absence or presence of 100 μM AICAR. The firefly luciferase activity was measured 24 h after transfection and normalized to *Renilla* luciferase activity.

Supplementary Table 1. Primers used for RT-PCR analyses

| Gene           | Primer sequence |                              |
|----------------|-----------------|------------------------------|
| CK2 $\alpha$   | Forward         | 5'-AAGACCCTGTGTCACGAACCC-3'  |
|                | Reverse         | 5'-GGCTCCTCCCGAAAGATCATAC-3' |
| GST            | Forward         | 5'-GACCTCACCCAGGTAATGGA-3'   |
|                | Reverse         | 5'-ATCCGTGCTCCGACAAATAG-3'   |
| GPX2           | Forward         | 5'-ATGGCTTTCATTGCCAAGTC-3'   |
|                | Reverse         | 5'-TTTTTGGACAAGGGTGAAGG-3'   |
| GSR1           | Forward         | 5'-ACTTGCCCATCGACTTTTTG-3'   |
|                | Reverse         | 5'-GTAGGGTGAATGGCGACTGT-3'   |
| NRF2           | Forward         | 5'-CGGTATGCAACAGGACATTG-3'   |
|                | Reverse         | 5'-ACTGGTTGGGGTCTTCTGTG-3'   |
| $\beta$ -actin | Forward         | 5'-TCCCTGGAGAAGAGCTACGA-3'   |
|                | Reverse         | 5'-AGCACTGTGTTGGCGTACAG-3'   |

GST, glutathione S-transferase; GPX2, glutathione peroxidase 2; GSR1, glutathione reductase 1
